# Supplementary material for: Quantifying the driving factors of particulate matter variabilities in the Beijing-Tianjin-Hebei and Yangtze River Delta regions from 2015 to 2022 by machine learning approach
Source: Copernicus journal article supplement (doi:10.5194/acp-26-2545-2026), 2026-02-18
Supplement: Supplementary file 1 [file acp-26-2545-2026-supplement.pdf]

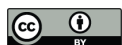

*Supplement of*

## **Quantifying the driving factors of particulate matter variabilities in the Beijing-Tianjin-Hebei and Yangtze River Delta regions from 2015 to 2022 by machine learning approach**

**Zhongfeng Pan et al.**

*Correspondence to:* Hao Yin ([haoyin@cityu.edu.hk](mailto:haoyin@cityu.edu.hk)) and Youwen Sun ([ywsun@ahu.edu.cn](mailto:ywsun@ahu.edu.cn))

The copyright of individual parts of the supplement might differ from the article licence.

## Supplement

### Tables

**Table S1.** The information of each city over BTH and YRD regions in this study. TaizhouJS denotes Taizhou City in Jiangsu Province, while TaizhouZJ refers to Taizhou City in Zhejiang Province. The altitude data represent the average elevation of the urban areas, with population and area statistics sourced from the Ministry of Civil Affairs of the People's Republic of China

| Name         | Latitude | Longitude | Altitude<br>(m) | Number of<br>site | Population<br>(million) | Area<br>(thousand<br>km <sup>2</sup> ) |
|--------------|----------|-----------|-----------------|-------------------|-------------------------|----------------------------------------|
| Beijing      | 40.0° N  | 116.4° E  | 455             | 12                | 13.92                   | 1.6                                    |
| Tianjin      | 39.1     | 117.3     | 64              | 15                | 11.05                   | 1.2                                    |
| Baoding      | 38.9     | 115.5     | 338             | 6                 | 10.9                    | 2.2                                    |
| Tangshan     | 39.6     | 118.1     | 90              | 6                 | 7.56                    | 1.3                                    |
| Langfang     | 39.5     | 116.7     | 45              | 4                 | 4.83                    | 0.6                                    |
| Shijiazhuang | 38.0     | 114.5     | 337             | 8                 | 9.89                    | 1.4                                    |
| Qinhuangdao  | 39.5     | 119.6     | 143             | 5                 | 3.01                    | 0.8                                    |
| Zhangjiakou  | 40.8     | 114.9     | 1203            | 5                 | 4.65                    | 3.6                                    |
| Chengde      | 41.0     | 117.9     | 829             | 5                 | 3.83                    | 4.0                                    |
| Cangzhou     | 38.3     | 116.9     | 11              | 3                 | 7.87                    | 1.3                                    |
| Hengshui     | 37.7     | 115.7     | 27              | 3                 | 4.58                    | 0.9                                    |
| Xingtai      | 37.1     | 114.5     | 356             | 4                 | 8.01                    | 1.2                                    |
| Handan       | 36.6     | 114.5     | 310             | 4                 | 10.61                   | 1.2                                    |
| Shanghai     | 31.2     | 121.5     | 13              | 10                | 14.69                   | 0.6                                    |
| Nanjing      | 32.1     | 118.8     | 28              | 9                 | 7.1                     | 0.7                                    |
| Wuxi         | 31.6     | 120.3     | 8               | 8                 | 5.03                    | 0.5                                    |
| Changzhou    | 31.8     | 120.0     | 5.3             | 6                 | 3.85                    | 0.4                                    |
| Suzhou       | 32.1     | 119.4     | 6               | 8                 | 7.23                    | 0.8                                    |
| Nantong      | 32.0     | 120.9     | 3               | 5                 | 7.6                     | 0.8                                    |
| Yancheng     | 33.4     | 120.2     | 3               | 4                 | 8.21                    | 1.7                                    |
| Yangzhou     | 32.4     | 119.4     | 10              | 4                 | 4.57                    | 0.7                                    |
| Zhenjiang    | 32.2     | 119.5     | 20              | 4                 | 2.7                     | 0.4                                    |

|           |      |       |     |    |      |     |
|-----------|------|-------|-----|----|------|-----|
| TaizhouJS | 32.4 | 120.0 | 7   | 4  | 5.01 | 0.6 |
| Hangzhou  | 30.2 | 120.1 | 186 | 11 | 7.59 | 1.7 |
| Ningbo    | 29.9 | 121.6 | 37  | 8  | 6.08 | 0.9 |
| Wenzhou   | 28.0 | 120.7 | 217 | 4  | 8.32 | 1.2 |
| Jiaxing   | 30.7 | 120.7 | 5   | 3  | 3.64 | 0.4 |
| Huzhou    | 30.9 | 120.1 | 65  | 3  | 2.68 | 0.6 |
| Shaoxing  | 30.0 | 120.6 | 180 | 3  | 4.48 | 0.8 |
| Jinhua    | 29.1 | 119.7 | 316 | 3  | 4.92 | 1.1 |
| Zhoushan  | 30.0 | 122.2 | 10  | 3  | 0.97 | 0.1 |
| TaizhouZJ | 28.6 | 121.4 | 141 | 3  | 6.07 | 0.9 |
| Hefei     | 31.8 | 117.2 | 71  | 10 | 7.7  | 1.1 |
| Wuhu      | 31.4 | 118.4 | 57  | 4  | 3.9  | 0.6 |
| Maanshan  | 31.7 | 118.5 | 23  | 5  | 2.29 | 0.4 |
| Tongling  | 30.9 | 117.8 | 100 | 6  | 1.71 | 0.3 |
| Anqing    | 30.5 | 117.0 | 210 | 4  | 5.92 | 1.4 |
| Chuzhou   | 32.3 | 118.3 | 36  | 3  | 4.55 | 1.3 |
| Chizhou   | 30.7 | 117.5 | 216 | 3  | 1.62 | 0.8 |
| Xuancheng | 31.0 | 118.7 | 226 | 3  | 2.79 | 1.2 |

---

**Table S2.** The input variables for LightGBM model in this study.

| Type        | Abbreviation | Description                                          | Source      |
|-------------|--------------|------------------------------------------------------|-------------|
|             |              | Cyclical month                                       |             |
|             | month_sin    | encoding (sine                                       |             |
| /           | month_cos    | term, cosine term),                                  | /           |
|             | season       | Seasonal index<br>(four-category<br>seasonal regime) |             |
|             |              | Total Cloud Cover                                    |             |
|             |              | Total Precipitation                                  |             |
|             | CLDTOT       | Specific Humidity at 2                               |             |
|             | PRECTOT      | Meters                                               |             |
|             | QV2M         | Temperature at 2                                     | 0.25° ×     |
| meteorogloy | T2M          | Meters                                               | 0.3125°GEOS |
|             | SLP          | Sea Level Pressure                                   | FP          |
|             | SWGDN        | Downward Shortwave                                   |             |
|             | U10M         | Radiation                                            |             |
|             | V10M         | 10 Meter U-Wind<br>Component                         |             |
|             |              | 10 Meter V-Wind<br>Component                         |             |
|             | CO_total,    |                                                      |             |
|             | NH3_total,   |                                                      |             |
|             | NOx_total,   |                                                      |             |
|             | BC_total,    |                                                      |             |
|             | SO2_total,   |                                                      |             |

---

|          |             |                   |                        |         |
|----------|-------------|-------------------|------------------------|---------|
|          |             | OC_total,         |                        |         |
|          |             | PRPE_total        | eight species-level    | 0.5x0.5 |
|          |             | CO_total_sdiff,   | aggregated             | CEDS    |
| emission |             | NH3_total_sdiff,  | emission totals        |         |
|          |             | NOx_total_sdiff,  | (e.g., NO_total,       |         |
|          |             | BC_total_sdiff,   | SO2_total,             |         |
|          |             | SO2_total_sdiff,  | BC_total), and two     |         |
|          |             | OC_total_sdiff,   | derived indicators     |         |
|          |             | PRPE_total_sdiff, | (sdiff and detr) for   |         |
|          |             | CO_total_detr,    | each emission          |         |
|          |             | NH3_total_detr,   | species                |         |
|          |             | NOx_total_detr,   |                        |         |
|          |             | BC_total_detr,    |                        |         |
|          |             | SO2_total_detr,   |                        |         |
|          |             | OC_total_detr,    |                        |         |
|          |             | PRPE_total_detr   |                        |         |
| Target   | observation | PM <sub>2.5</sub> | Average observation    |         |
|          |             | PM <sub>10</sub>  | data per hour of near- | CNEMC   |
|          |             |                   | surface observation    |         |

---

**Table S3.** Ranges of optimized LightGBM hyperparameters used across all city–pollutant models in this study. The full set of fold-wise hyperparameter configurations, including all individual parameter values and seeds, is supplied in the train/seeds directory of the associated code release.

| Hyperparameter        | Min    | Max    |
|-----------------------|--------|--------|
| learning_rate         | 0.0676 | 0.2857 |
| n_estimators          | 130    | 267    |
| num_leaves            | 17     | 43     |
| max_depth             | 5      | 9      |
| min_child_samples     | 7      | 22     |
| subsample             | 0.6232 | 0.8909 |
| colsample_bytree      | 0.6488 | 0.9089 |
| reg_alpha             | 0.1560 | 0.7290 |
| reg_lambda            | 0.1560 | 0.9267 |
| subsample_freq        | 1      | 1      |
| bagging_seed          | 42     | 42     |
| data_random_seed      | 42     | 42     |
| feature_fraction_seed | 42     | 42     |
| deterministic         | true   | true   |
| early_stopping_rounds | 20     | 20     |

**Table S4.** Linear trend slopes, corresponding 1- $\sigma$  uncertainties, relative (% yr<sup>-1</sup>) trends with uncertainties, and p-values for annual mean PM<sub>2.5</sub> and PM<sub>10</sub> concentrations in all cities from 2015 to 2022. Trend estimates include absolute trends ( $\mu\text{g m}^{-3} \text{ yr}^{-1}$ ), relative trends (% yr<sup>-1</sup>), and their associated uncertainties. TaizhouJS denotes Taizhou City in Jiangsu Province, while TaizhouZJ refers to Taizhou City in Zhejiang Province.

| city         | 25_trend | 25_trend_err | 25_reltrend_% | 25_reltrend_err_% | 10_trend | 10_trend_err | 10_reltrend_% | 10_reltrend_err_% | 10_pvalue | 2.5_pvalue |
|--------------|----------|--------------|---------------|-------------------|----------|--------------|---------------|-------------------|-----------|------------|
| Anqing       | 3.3983   | 0.7671       | -7.6115       | 1.7182            | -3.9633  | 1.0477       | -6.2525       | 1.6529            | 0.0092    | 0.0044     |
| Baoding      | -9.4582  | 0.7421       | -13.9148      | 1.0918            | 13.0678  | 1.4594       | -11.1494      | 1.2451            | 0.0001    | 0.0000     |
| Beijing      | -7.1168  | 0.6514       | -14.1909      | 1.2990            | -7.5035  | 0.9996       | -9.6159       | 1.2810            | 0.0003    | 0.0000     |
| Cangzhou     | -5.1604  | 0.3471       | -9.4390       | 0.6349            | -7.2555  | 0.5567       | -7.5933       | 0.5827            | 0.0000    | 0.0000     |
| Changzhou    | -2.9619  | 0.5008       | -6.7848       | 1.1471            | -5.1896  | 1.1999       | -7.2187       | 1.6690            | 0.0050    | 0.0010     |
| Chengde      | -1.9808  | 0.3475       | -6.1331       | 1.0759            | -4.9551  | 1.0341       | -7.1462       | 1.4914            | 0.0030    | 0.0013     |
| Chizhou      | -1.5253  | 1.5745       | -3.6565       | 3.7743            | -1.8358  | 2.0336       | -2.9023       | 3.2151            | 0.4015    | 0.3701     |
| Chuzhou      | -4.2812  | 1.1209       | -8.6680       | 2.2694            | -4.1781  | 1.6955       | -5.3563       | 2.1736            | 0.0488    | 0.0088     |
| Handan       | -6.4607  | 0.6468       | -9.4392       | 0.9449            | 12.1742  | 0.9925       | -9.5269       | 0.7767            | 0.0000    | 0.0001     |
| Hangzhou     | -3.5669  | 0.4246       | -9.3057       | 1.1078            | -4.0655  | 0.3304       | -6.2661       | 0.5092            | 0.0000    | 0.0002     |
| Hefei        | -4.8250  | 0.3327       | -10.4358      | 0.7196            | -4.6190  | 0.8855       | -6.1319       | 1.1756            | 0.0020    | 0.0000     |
| Hengshui     | -8.3632  | 0.6693       | -12.9384      | 1.0354            | 13.7939  | 1.8179       | -12.1935      | 1.6069            | 0.0003    | 0.0000     |
| Huzhou       | -5.6852  | 1.2180       | -12.8548      | 2.7540            | -5.4936  | 1.0600       | -7.8470       | 1.5141            | 0.0020    | 0.0034     |
| Jiaxing      | -3.6855  | 0.3694       | -10.0369      | 1.0059            | -4.5766  | 0.4980       | -7.7136       | 0.8394            | 0.0001    | 0.0001     |
| Jinhua       | -3.8504  | 0.5275       | -10.5930      | 1.4513            | -3.5175  | 0.4607       | -6.1865       | 0.8102            | 0.0003    | 0.0003     |
| Langfang     | -6.4373  | 0.7907       | -12.1520      | 1.4926            | -8.8456  | 1.0815       | -9.2034       | 1.1253            | 0.0002    | 0.0002     |
| Maanshan     | -3.4061  | 0.7181       | -7.4615       | 1.5730            | -4.6606  | 0.9821       | -6.3858       | 1.3456            | 0.0032    | 0.0032     |
| Nanjing      | -3.6979  | 0.4796       | -9.2912       | 1.2049            | -5.8893  | 0.6359       | -8.1153       | 0.8762            | 0.0001    | 0.0002     |
| Nantong      | -3.6112  | 0.4596       | -9.2248       | 1.1741            | -5.5371  | 0.6159       | -9.1855       | 1.0217            | 0.0001    | 0.0002     |
| Ningbo       | -3.3387  | 0.3306       | -10.8340      | 1.0729            | -4.6377  | 0.4507       | -9.1112       | 0.8854            | 0.0000    | 0.0001     |
| Qinhuangdao  | -2.5499  | 0.3656       | -6.5147       | 0.9340            | -5.4983  | 0.6103       | -7.2156       | 0.8009            | 0.0001    | 0.0004     |
| Shanghai     | -3.6972  | 0.3830       | -10.0904      | 1.0452            | -4.7012  | 0.5427       | -8.9540       | 1.0336            | 0.0001    | 0.0001     |
| Shaoxing     | -3.5070  | 0.4942       | -9.3036       | 1.3111            | -7.3633  | 2.8905       | -9.5716       | 3.7573            | 0.0436    | 0.0004     |
| Shijiazhuang | -7.1995  | 0.7383       | -10.5791      | 1.0849            | 10.5974  | 1.4399       | -8.4759       | 1.1517            | 0.0003    | 0.0001     |
| Suzhou       | -3.7795  | 0.4237       | -9.5653       | 1.0724            | -5.2528  | 0.5457       | -8.4970       | 0.8828            | 0.0001    | 0.0001     |

---

|             |         |        |          |        |         |        |          |        |        |        |
|-------------|---------|--------|----------|--------|---------|--------|----------|--------|--------|--------|
| TaizhouJS   | -4.0047 | 0.2671 | -8.7936  | 0.5866 | -7.1152 | 0.6978 | -9.4391  | 0.9257 | 0.0001 | 0.0000 |
| TaizhouZJ   | -2.7186 | 0.2566 | -9.2832  | 0.8761 | -3.4839 | 0.2146 | -6.7301  | 0.4145 | 0.0000 | 0.0000 |
| Tangshan    | -6.4196 | 0.3074 | -10.9611 | 0.5249 | -9.5901 | 0.6057 | -8.9741  | 0.5668 | 0.0000 | 0.0000 |
| Tianjin     | -5.0378 | 0.4788 | -9.4498  | 0.8981 | -7.4306 | 0.9184 | -8.3804  | 1.0358 | 0.0002 | 0.0000 |
| Tongling    | -3.5793 | 1.2085 | -7.5729  | 2.5570 | -3.8398 | 1.0910 | -5.0328  | 1.4300 | 0.0125 | 0.0252 |
| Wenzhou     | -2.8331 | 0.3271 | -8.9914  | 1.0381 | -3.6385 | 0.3295 | -6.2645  | 0.5673 | 0.0000 | 0.0001 |
| Wuhu        | -3.2490 | 0.9208 | -7.0767  | 2.0055 | -4.5983 | 0.9085 | -6.7057  | 1.3249 | 0.0023 | 0.0124 |
| Wuxi        | -4.5422 | 0.3632 | -10.9716 | 0.8772 | -5.9502 | 0.5444 | -8.3945  | 0.7680 | 0.0000 | 0.0000 |
| Xingtai     | -8.0177 | 0.5599 | -11.7159 | 0.8182 | 12.7585 | 1.2946 | -10.2946 | 1.0446 | 0.0001 | 0.0000 |
| Xuancheng   | -3.0473 | 0.8993 | -7.1770  | 2.1181 | -5.0424 | 1.0584 | -8.2257  | 1.7266 | 0.0031 | 0.0147 |
| Yancheng    | -2.8740 | 0.2944 | -7.5643  | 0.7750 | -4.9486 | 0.4839 | -7.4602  | 0.7295 | 0.0001 | 0.0001 |
| Yangzhou    | -3.4277 | 0.4217 | -7.8603  | 0.9671 | -6.0637 | 0.9556 | -7.5957  | 1.1971 | 0.0007 | 0.0002 |
| Zhangjiakou | -1.9981 | 0.4184 | -7.0884  | 1.4843 | -5.0129 | 1.6771 | -7.2176  | 2.4147 | 0.0244 | 0.0031 |
| Zhenjiang   | -3.3792 | 0.5744 | -7.2105  | 1.2256 | -5.3458 | 0.8955 | -7.2924  | 1.2216 | 0.0010 | 0.0011 |
| Zhoushan    | -2.1100 | 0.1445 | -10.1085 | 0.6920 | -2.7698 | 0.3012 | -7.4022  | 0.8051 | 0.0001 | 0.0000 |

---

**Table S5.** The performance of LightGBM model of PM<sub>2.5</sub> and PM<sub>10</sub>, respectively. TaizhouJS denotes Taizhou City in Jiangsu Province, while TaizhouZJ refers to Taizhou City in Zhejiang Province.

| city         | PM2.5_r | PM10_r | PM2.5_RMSE | PM10_RMSE | PM2.5_MAE | PM10_MAE |
|--------------|---------|--------|------------|-----------|-----------|----------|
| Beijing      | 0.5644  | 0.5718 | 20.6706    | 26.6527   | 14.4762   | 19.8407  |
| Tianjin      | 0.6921  | 0.6506 | 15.6387    | 23.8791   | 11.0815   | 17.0144  |
| Baoding      | 0.8272  | 0.7767 | 24.0149    | 34.9302   | 16.9075   | 24.3295  |
| Tangshan     | 0.5321  | 0.5480 | 20.9724    | 30.5558   | 15.5568   | 23.6637  |
| Langfang     | 0.7237  | 0.7083 | 18.51454   | 25.5347   | 12.2293   | 18.6210  |
| Shijiazhuang | 0.7794  | 0.5854 | 24.5459    | 44.7494   | 17.3812   | 31.3860  |
| Qinhuangdao  | 0.7011  | 0.6276 | 11.2524    | 20.1793   | 8.6251    | 15.3492  |
| Zhangjiakou  | 0.5500  | 0.4491 | 7.9217     | 27.5828   | 5.9925    | 17.7796  |
| Chengde      | 0.7144  | 0.6448 | 7.5943     | 18.6286   | 5.6171    | 13.6455  |
| Cangzhou     | 0.8475  | 0.8461 | 13.5138    | 19.5238   | 10.0303   | 14.5251  |
| Hengshui     | 0.8444  | 0.7810 | 18.7663    | 33.8730   | 12.4934   | 22.9780  |
| Xingtai      | 0.6747  | 0.6381 | 28.3779    | 41.3640   | 21.3908   | 31.8897  |
| Handan       | 0.7116  | 0.5325 | 25.7263    | 46.7850   | 18.4948   | 36.8554  |
| Shanghai     | 0.8062  | 0.6959 | 8.9958     | 12.6902   | 7.0622    | 9.8051   |
| Nanjing      | 0.6616  | 0.7646 | 13.9181    | 17.7208   | 10.4673   | 13.5751  |
| Wuxi         | 0.5760  | 0.7580 | 14.5735    | 16.4633   | 10.2702   | 12.6619  |
| Changzhou    | 0.8164  | 0.8292 | 10.1111    | 14.3833   | 7.4144    | 10.5479  |
| Suzhou       | 0.8560  | 0.6876 | 9.0761     | 15.5955   | 6.8452    | 12.4429  |
| Nantong      | 0.7061  | 0.4730 | 11.5009    | 18.4416   | 8.7388    | 14.6917  |
| Yancheng     | 0.8982  | 0.8064 | 7.3902     | 14.4755   | 5.5103    | 11.4200  |
| Yangzhou     | 0.8540  | 0.8170 | 9.6491     | 16.4180   | 7.7381    | 12.3822  |
| Zhenjiang    | 0.6686  | 0.7201 | 14.0041    | 17.5832   | 11.1591   | 14.5593  |
| TaizhouJS    | 0.7802  | 0.6517 | 11.6168    | 22.2128   | 9.4414    | 17.7950  |
| Hangzhou     | 0.8874  | 0.8827 | 7.5883     | 10.9447   | 5.5673    | 8.2949   |
| Ningbo       | 0.7471  | 0.7475 | 9.4954     | 13.9908   | 6.6607    | 10.4041  |
| Wenzhou      | 0.8137  | 0.7777 | 6.5513     | 11.0396   | 4.6793    | 8.3051   |
| Jiaxing      | 0.6404  | 0.8196 | 11.7675    | 12.4162   | 8.0015    | 9.1972   |

---

|           |        |        |         |         |         |         |
|-----------|--------|--------|---------|---------|---------|---------|
| Huzhou    | 0.5938 | 0.6861 | 15.7273 | 15.3358 | 12.5205 | 12.4943 |
| Shaoxing  | 0.8407 | 0.7143 | 8.2785  | 22.6327 | 6.1060  | 19.4315 |
| Jinhua    | 0.7593 | 0.6948 | 10.3149 | 13.2076 | 6.6223  | 9.9251  |
| Zhoushan  | 0.5642 | 0.6720 | 7.0846  | 9.5627  | 5.5608  | 7.4310  |
| TaizhouZJ | 0.8367 | 0.7543 | 6.4091  | 10.9694 | 4.6700  | 8.2166  |
| Hefei     | 0.8776 | 0.7970 | 10.4666 | 14.6836 | 7.6459  | 11.4373 |
| Wuhu      | 0.8404 | 0.7236 | 11.3914 | 17.3035 | 8.7330  | 13.3670 |
| Maanshan  | 0.8696 | 0.7880 | 9.6970  | 14.4269 | 7.2498  | 10.9133 |
| Tongling  | 0.8480 | 0.7748 | 10.7971 | 15.6917 | 8.4124  | 11.9264 |
| Anqing    | 0.8896 | 0.8374 | 9.9570  | 13.5580 | 8.2567  | 10.6048 |
| Chuzhou   | 0.8427 | 0.7694 | 11.2695 | 16.7653 | 8.8733  | 12.8443 |
| Chizhou   | 0.8381 | 0.7932 | 11.4400 | 16.3194 | 9.2961  | 13.209  |
| Xuancheng | 0.8149 | 0.6723 | 11.2669 | 16.8123 | 9.3296  | 12.6950 |

---

Figures

Spatial distribution of study cities

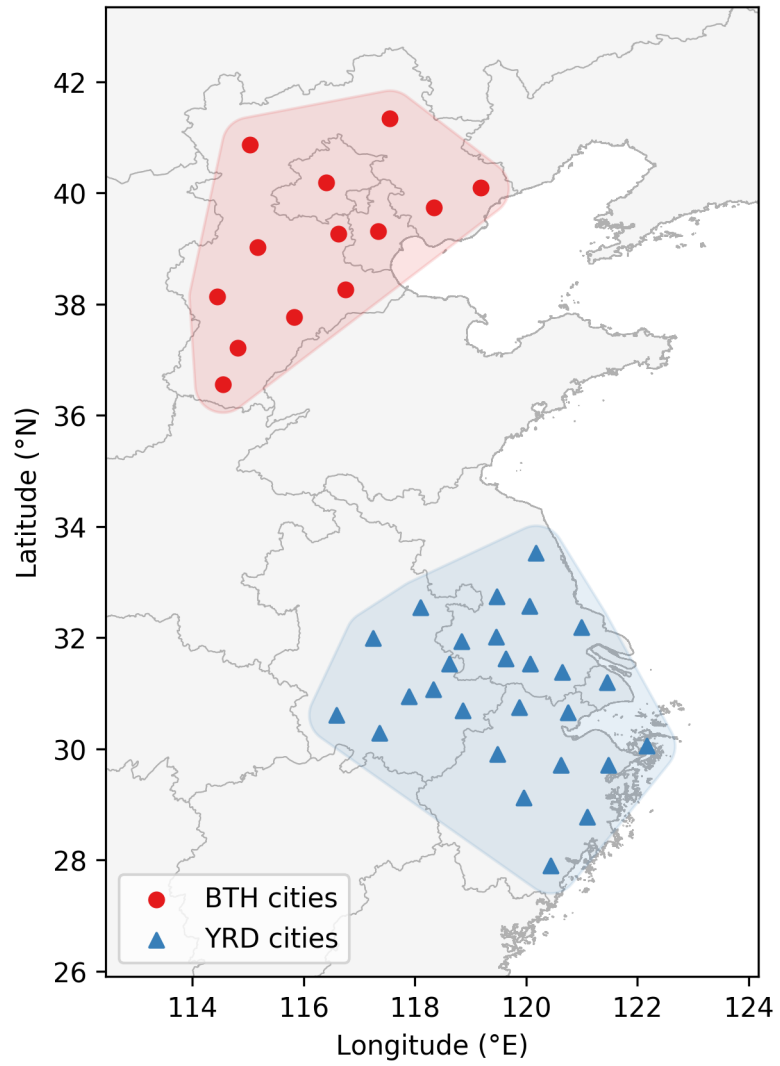

Fig.S1. Beijing-Tianjin-Hebei Yangtze River Delta city distribution map

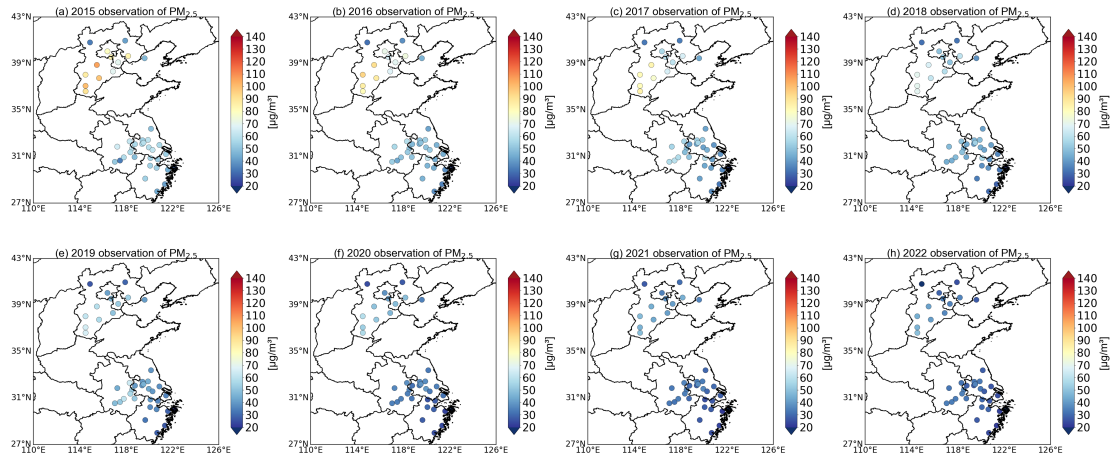

**Fig. S2.** The average concentrations of PM<sub>2.5</sub> over BTH and YRD regions during 2015 to 2022.

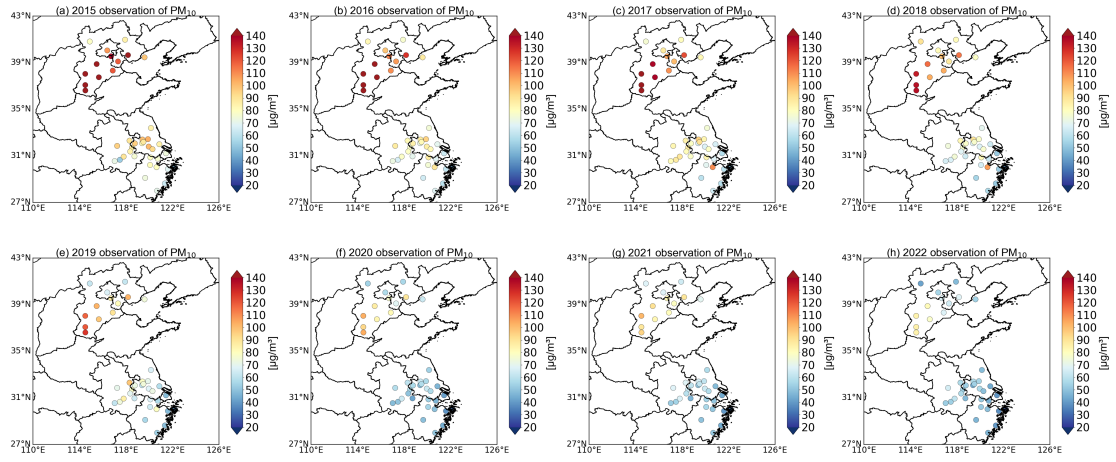

**Fig. S3.** The average concentrations of PM<sub>10</sub> over BTH and YRD regions during 2015 to 2022.

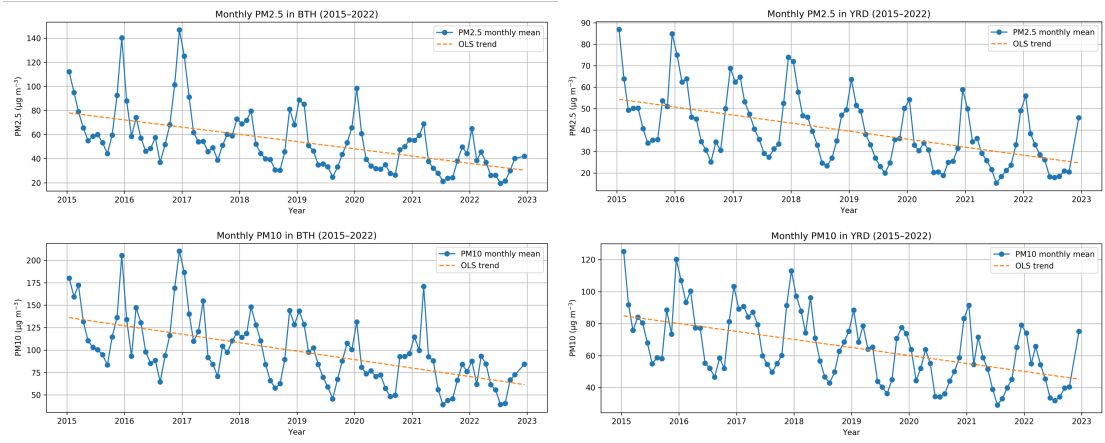

**Fig.S4.** Monthly mean  $\text{PM}_{2.5}$  and  $\text{PM}_{10}$  time series for the BTH and YRD regions from 2015 to 2022, with corresponding OLS fitted trend lines.

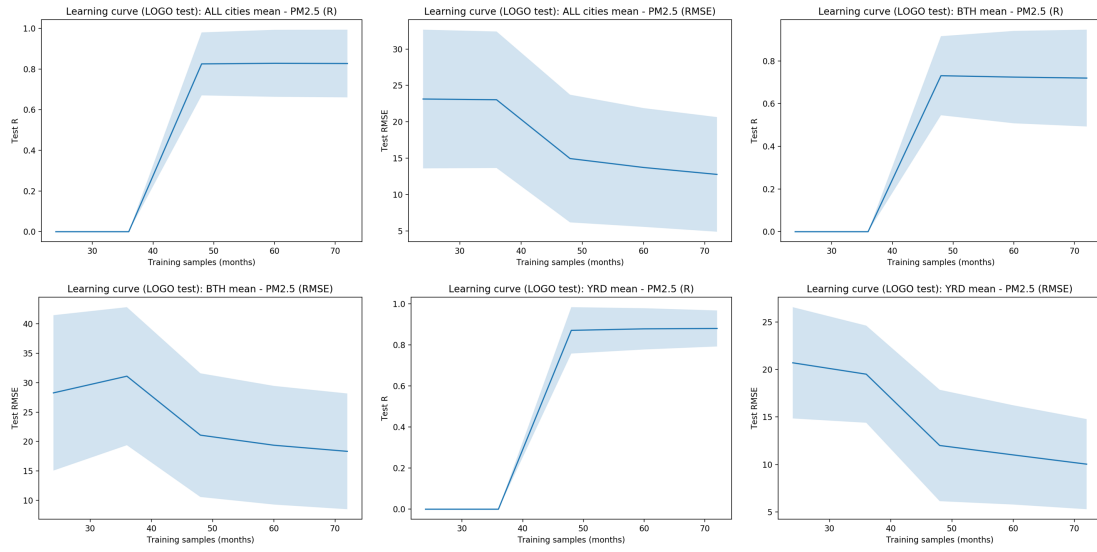

**Fig.S5.** Learning curves for PM<sub>2.5</sub> prediction under the leave-one-year-out (LOGO) cross-validation framework. The panels show test performance as a function of training sample size (months) for the all-city mean, the Beijing–Tianjin–Hebei (BTH) region, and the Yangtze River Delta (YRD) region. For each domain, the learning curve is reported using the test correlation coefficient (R) and the test root mean square error (RMSE), shown in separate panels. Solid lines denote the mean across LOGO folds, and the shaded areas indicate variability among folds.

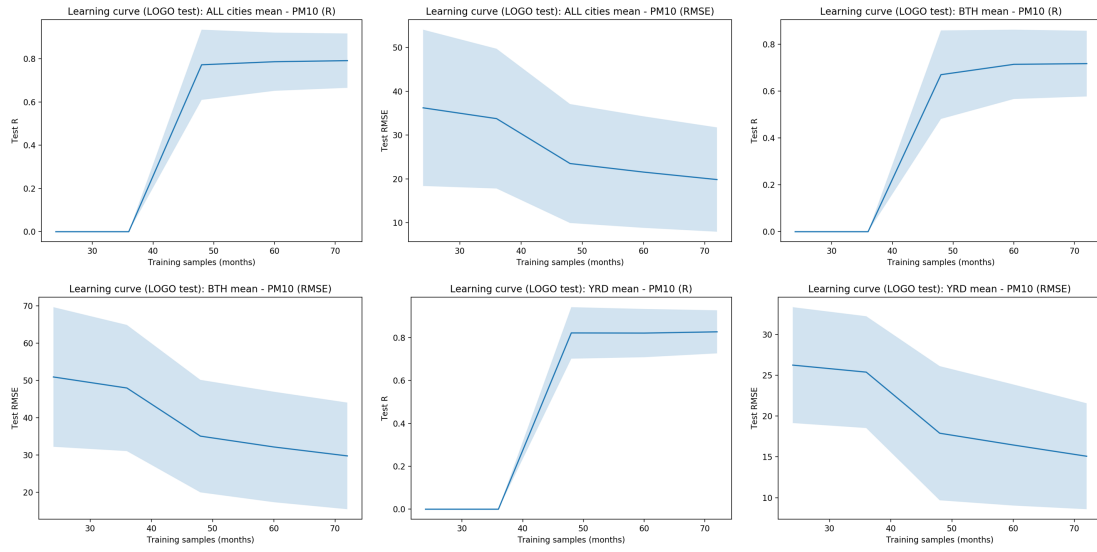

**Fig.S6.** Learning curves for  $PM_{10}$  prediction under the leave-one-year-out (LOGO) cross-validation framework. The panels show test performance as a function of training sample size (months) for the all-city mean, the Beijing–Tianjin–Hebei (BTH) region, and the Yangtze River Delta (YRD) region. For each domain, the learning curve is reported using the test correlation coefficient (R) and the test root mean square error (RMSE), shown in separate panels. Solid lines denote the mean across LOGO folds, and the shaded areas indicate variability among folds.

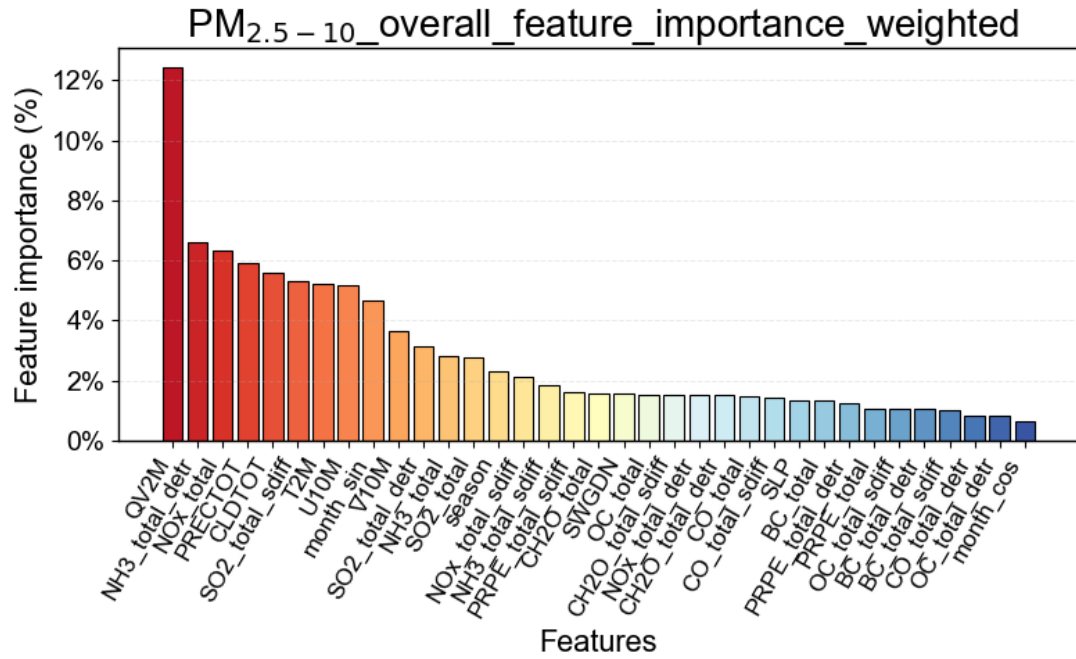

**Fig.S7.** Overall SHAP-based feature importance for the coarse-mode mass PM<sub>2.5-10</sub> (PM<sub>10</sub> minus PM<sub>2.5</sub>), derived from the LightGBM models under the leave-one-year-out cross-validation framework. Bars show the weighted mean contribution of each predictor across all cities and years, expressed as a percentage of total importance. Features include emission-related variables, meteorological variables, and their temporal descriptors (sdiff and detr), ranked in descending order of importance.
